# Supplementary material for: Efficient electrochemical water splitting using copper molybdenum sulfide anchored Ni foam as a high-performance bifunctional catalyst
Source: Royal Society of Chemistry journal article supplement (doi:10.1039/d0ma00688b), 2020-12-10
Supplement: d0ma00688b1.pdf [file d0ma00688b1.pdf]

*Electronic supporting information for*

**Efficient electrochemical water splitting using copper molybdenum sulfide anchored Ni  
foam as high-performance bifunctional catalyst**

Aparna Sajeev<sup>1</sup>, Vimal Kumar Mariappan<sup>1</sup>, Dhanasekar Kesavan<sup>1</sup>, Karthikeyan  
Krishnamoorthy<sup>1</sup>, and Sang-Jae Kim<sup>1,2\*</sup>

<sup>1</sup>Nanomaterials & System Laboratory, Major of Mechatronics Engineering,  
Faculty of Applied Energy System, Jeju National University, Jeju 63243, Republic of Korea.

<sup>2</sup> Department of Advanced Convergence Science & Technology, Jeju National University,  
Jeju-63243, South Korea.

\*Corresponding Email id.: [kimsangj@jejunu.ac.kr](mailto:kimsangj@jejunu.ac.kr)

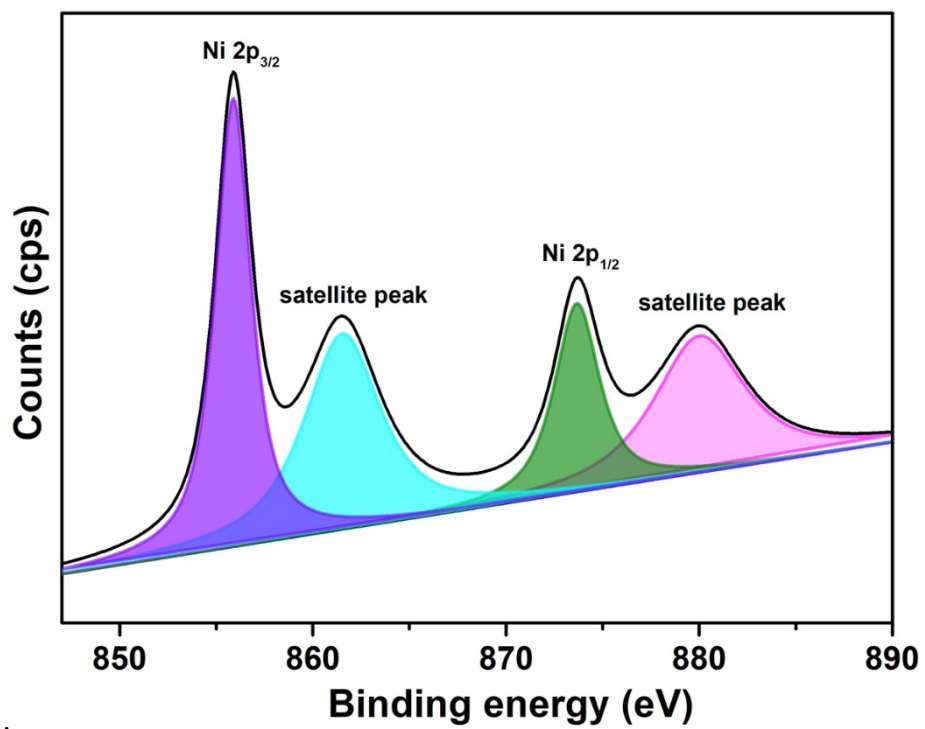

Figure S1. XPS core level spectrum of spectrum of Ni 2p in CMS/Ni foam

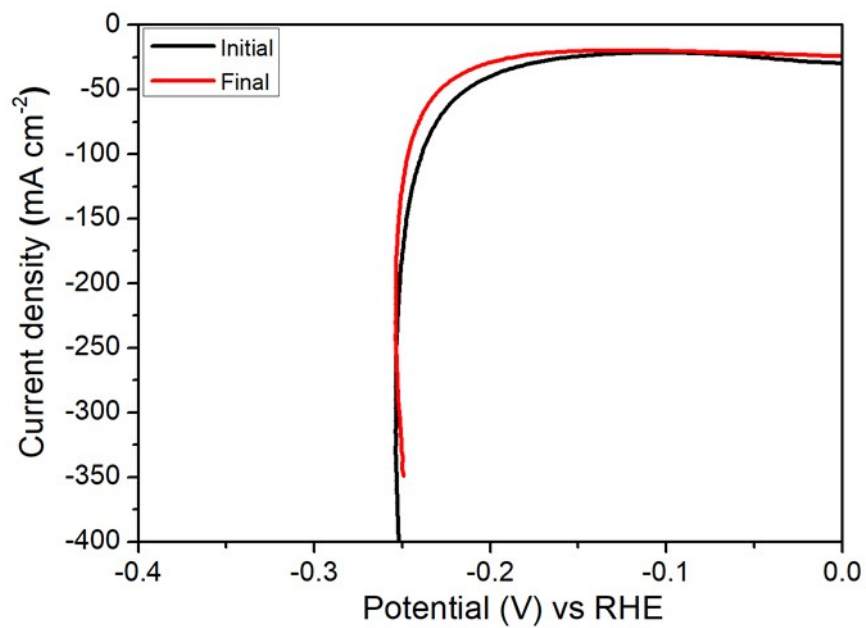

Figure S2. Linear sweep voltammogram analysis of CMS/Ni foam for initial and after durability test of Electrochemical HER activity

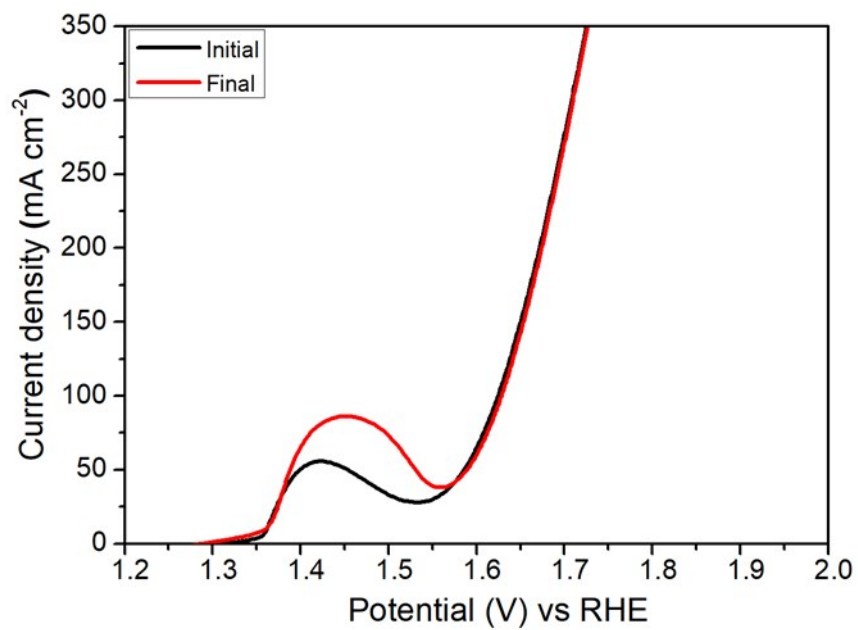

Figure S3. Linear sweep voltammogram analysis of CMS/Ni foam for initial and after durability test of Electrochemical OER activity

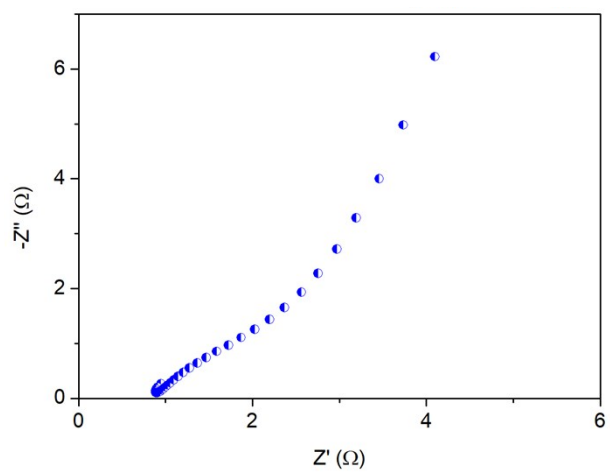

Figure S4. Electrochemical impedance analysis: Nyquist plot of CMS/Ni electrocatalyst.

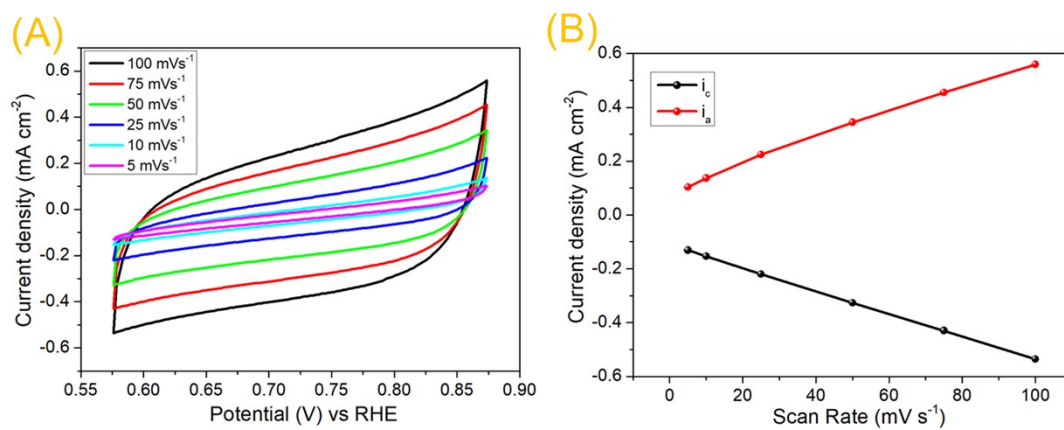

Figure S5 (A) Cyclic voltammograms for CMS/Ni electrocatalyst at various scan rate. (B) The plot of scan rate vs current density of CMS /Ni electrocatalyst in 1 M KOH electrolyte.

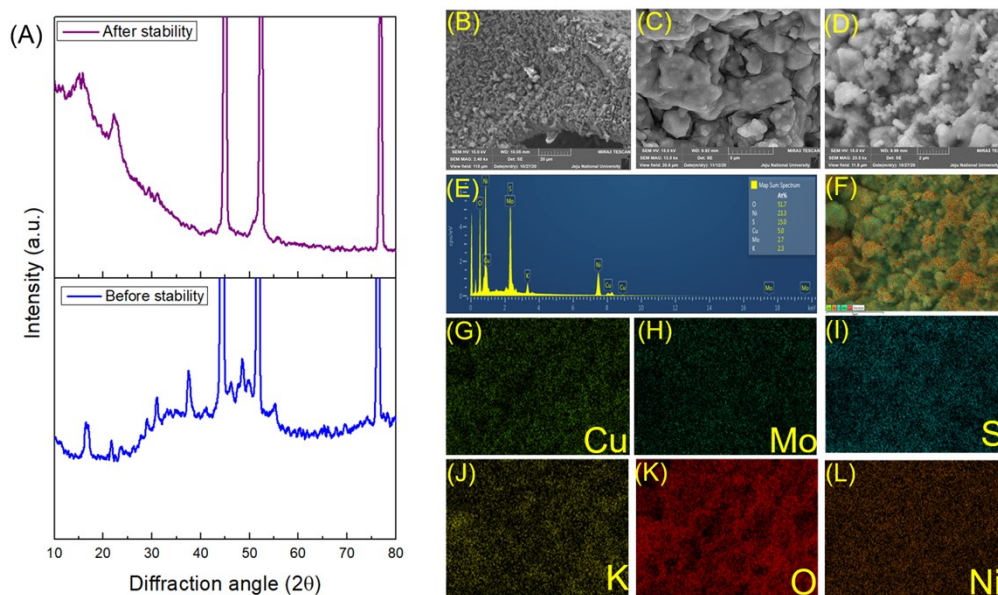

Figure S6. (A) X-ray diffraction pattern of CMS/Ni nanostructures before and long-term stability tests, (B-D) Field emission scanning electron micrographs, (E) EDX spectrum, (F-L) elemental maps of CMS/Ni electrode after long-term electrochemical stability.

Table S1. Comparison of recently reported HER electrocatalysts performance with the as synthesized CMS/Ni foam electrocatalyst in electrolyte of 1 M KOH

| Catalyst                                             | Substrate      | Electrolyte                                        | Current density (mA cm <sup>-2</sup> ) | Overpotential (mV) | Reference        |
|------------------------------------------------------|----------------|----------------------------------------------------|----------------------------------------|--------------------|------------------|
| NiCo <sub>2</sub> S <sub>4</sub> NW/NF               | NF             | 1 M KOH                                            | 10                                     | 210                | 1                |
| CoS <sub>x</sub> /Ni <sub>3</sub> S <sub>2</sub> @NF | NF             | 1 M KOH                                            | 10                                     | 240                | 2                |
| CoS <sub>x</sub> /Ni <sub>3</sub> S <sub>2</sub> @NF | NF             | 1 M KOH                                            | 10                                     | 204                | 3                |
| Ni <sub>3</sub> S <sub>2</sub> nanosheet arrays      | NF             | 1 M KOH                                            | 10                                     | 223                | 4                |
| CoS-CC                                               | CC             | 1 M KOH<br>0.5 M<br>H <sub>2</sub> SO <sub>4</sub> | 10                                     | 192<br>212         | 5                |
| Nickel cobalt sulfide                                | CFC            | 1 M KOH                                            | 10                                     | 282                | 6                |
| Co <sub>9</sub> S <sub>8</sub> HNSs                  | Carbon paper   | 1 M KOH                                            | 10                                     | 267                | 7                |
| Co <sub>3</sub> S <sub>4</sub> HNSs                  | Carbon paper   | 1 M KOH                                            | 10                                     | 221                | 7                |
| Ni-Co-S                                              | FTO            | 1 M<br>K <sub>2</sub> HPO <sub>4</sub>             | 10                                     | 280                | 8                |
| Co@Co <sub>3</sub> O <sub>4</sub> -NC                | GCE            | 1 M KOH                                            | 10                                     | 221                | 9                |
| NiS <sub>2</sub> HMSs                                | GCE            | 1 M KOH                                            | 10                                     | 219                | 7                |
| Cu <sub>2</sub> MoS <sub>4</sub> /MWCNT              | GCE            | 0.5 M<br>H <sub>2</sub> SO <sub>4</sub>            | 10                                     | 247                | 10               |
| Pt/C                                                 | GCE            | 1 M KOH                                            | 10                                     | 32                 | 1                |
| <b>Copper Molybdenum Sulphide</b>                    | <b>Ni Foam</b> | <b>1 M KOH</b>                                     | <b>50</b>                              | <b>213</b>         | <b>This work</b> |



Table S2. Comparison of recently reported OER electrocatalysts performance with the as synthesized CMS/Ni foam electrocatalyst in electrolyte of 1 M KOH

| Catalyst                                             | Substrate      | Electrolyte    | Current density (mA cm <sup>-2</sup> ) | Overpotential (mV) | Reference        |
|------------------------------------------------------|----------------|----------------|----------------------------------------|--------------------|------------------|
| Ni <sub>3</sub> S <sub>4</sub> (NiS/NF)              | Ni foam        | 1 M KOH        | 20                                     | 320                | 11               |
| NiS-10                                               |                |                | 20                                     | 344                |                  |
| Mo-Ni-Se@NF                                          | NF             | 1 M KOH        | 100                                    | 397                | 12               |
| NiMoN-400 NRs<br>Co-NiMoN-400 NRs                    | NF             | 1 M KOH        | 10                                     | 326<br>282         | 13               |
| Cu <sub>1-x</sub> Ni <sub>x</sub> S/NF               | NF             | 1 M KOH        | 20                                     | 350                | 14               |
| FeS                                                  | NF             | 1 M KOH        | 50                                     | 430                | 15               |
| CoS                                                  | NF             | 1 M KOH        | 50                                     | 530                | 15               |
| NiS                                                  | NF             | 1 M KOH        | 50                                     | 530                | 15               |
| CuS                                                  | NF             | 1 M KOH        | 50                                     | 510                | 15               |
| Cu <sub>2</sub> S-Ni <sub>3</sub> S <sub>2</sub> /NF | NF             |                | 10                                     | 329                | 16               |
| Ni <sub>3</sub> S <sub>2</sub> films on NF           | NF             | 1 M KOH        | 10                                     | 312                | 4                |
| Co <sub>9</sub> S <sub>8</sub> HNSs                  | Carbon paper   | 1 M KOH        | 10                                     | 342                | 7                |
| MoS <sub>2</sub> @CoO                                | CC             | 1 M KOH        | 10                                     | 325                | 17               |
| Co <sub>9</sub> S <sub>8</sub> @MoS <sub>2</sub>     | GC             | 1 M KOH        | 10                                     | 340                | 18               |
| NiCoS-3 polyhedron                                   | GC             | 1 M KOH        | 10                                     | 320                | 19               |
| Co@Co <sub>3</sub> O <sub>4</sub> -NC                | GC             | 1 M KOH        | 10                                     | 391                | 9                |
| IrO <sub>2</sub>                                     | GCE            | 1 M KOH        | 10                                     | 340                | 1                |
| <b>Copper Molybdenum Sulphide</b>                    | <b>Ni Foam</b> | <b>1 M KOH</b> | <b>50</b>                              | <b>350</b>         | <b>This work</b> |

Table S3. Comparison of recently reported bifunctional electrocatalysts performance with the as synthesized CMS/Ni foam electrocatalyst in electrolyte of 1 M KOH

| Catalyst                                                             | Electrolyte    | Current density (mA cm <sup>-2</sup> ) | Voltage (V) | Reference        |
|----------------------------------------------------------------------|----------------|----------------------------------------|-------------|------------------|
| NiS/NF                                                               | 1 M KOH        | 10                                     | 1.61        | 11               |
| NiCo <sub>2</sub> S <sub>4</sub> NW/NF                               | 1 M KOH        | 10                                     | 1.63        | 1                |
| Co <sub>3</sub> S <sub>4</sub> -L                                    |                | 10                                     | 1.63        | 20               |
| Cu <sub>1-x</sub> Ni <sub>x</sub> S/NF                               | 1 M KOH        | 10                                     | 1.64        | 14               |
| NiS/Ni foam                                                          |                | 10                                     | 1.64        | 21               |
| CoNi <sub>2</sub> S <sub>4</sub> /Ni <sub>3</sub> S <sub>2</sub> @NF | 1 M KOH        | 10                                     | 1.65        | 22               |
| C <sub>2</sub> M <sub>1</sub> S                                      | 1 M KOH        | 10                                     | 1.668       | 23               |
| NiCo-LDH/NF                                                          |                | 10                                     | 1.66        | 24               |
| Co <sub>9</sub> S <sub>8</sub> @MoS <sub>2</sub>                     | 1 M KOH        | 10                                     | 1.67        | 18               |
| Ni <sub>3</sub> S <sub>2</sub> films on NF                           | 1 M KOH        | 10                                     | 1.68        | 25               |
| CoS <sub>x</sub> /Ni <sub>3</sub> S <sub>2</sub> @NF                 | 1 M KOH        | 50                                     | 1.69        | 2                |
| CNT@NiSe/SS                                                          | 1 M KOH        | 10                                     | 1.71        | 26               |
| Ni <sub>3</sub> S <sub>2</sub> /NF                                   | 1 M KOH        | 13                                     | 1.76        | 4                |
| Cu <sub>2</sub> S-Ni <sub>3</sub> S <sub>2</sub> /NF                 | 1 M KOH        | 10                                     | 1.77        | 16               |
| Co@Co <sub>3</sub> O <sub>4</sub> -NC                                | 1 M KOH        | 10                                     | 2.004       | 9                |
| <b>Copper Molybdenum Sulphide</b>                                    | <b>1 M KOH</b> | <b>10</b>                              | <b>1.62</b> | <b>This work</b> |

## References

- 1 A. Sivanantham, P. Ganesan and S. Shanmugam, *Adv. Funct. Mater.*, 2016, **26**, 4661–4672.
- 2 S. Song, Y. Wang, W. Li, P. Tian, S. Zhou, H. Gao, X. Tian and J. Zang, *J. Alloys Compd.*, 2020, 154299.
- 3 S. Shit, S. Chhetri, W. Jang, N. C. Murmu, H. Koo, P. Samanta and T. Kuila, *ACS Appl. Mater. Interfaces*, 2018, **10**, 27712–27722.
- 4 L. Feng, G. Yu, Y. Wu, G.-D. Li, H. Li, Y. Sun, T. Asefa, W. Chen and X. Zou, *J. Am. Chem. Soc.*, 2015, **137**, 14023–14026.
- 5 N. Li, X. Liu, G. Li, Y. Wu and R. Gao, *Int. J. Hydrogen Energy*, 2017, 1–8.
- 6 J. Tie, J. Han, G. Diao, J. Liu, Z. Xie and G. Cheng, *Appl. Surf. Sci.*, 2018, **435**, 187–194.
- 7 X. Ma, W. Zhang, Y. Deng, C. Zhong, W. Hu and X. Han, *Nanoscale*, 2018, **10**, 4816–4824.
- 8 A. Irshad and N. Munichandraiah, *ACS Appl. Mater. Interfaces*, 2017, **9**, 19746–19755.
- 9 X. Qiao, J. Jin, H. Fan, Y. Li and S. Liao, *J. Mater. Chem. A*, 2017, **5**, 12354–12360.
- 10 J. Zhou, G. Xu, Z. Zhang and H. Wang, *New J. Chem.*, 2019, **43**, 9574–9582.
- 11 J. Ren and Z. Yuan, *ACS Sustain. Chem. Eng.*, 2017, **5**, 7203–7210.
- 12 H. Yang, Y. Huang, W. Y. Teoh, L. Jiang, W. Chen, L. Zhang and J. Yan, *Electrochim. Acta*, 2020, 136336.
- 13 Z. Yin, Y. Sun, Y. Jiang, F. Yan, C. Zhu and Y. Chen, 1–23.
- 14 Y. Li, H. Su, J. Fu and X. Du, *Int. J. Hydrogen Energy*, 2019, **44**, 11744–11753.
- 15 A. Shankar, R. Elakkiya and G. Maduraiveeran, *New J. Chem.*, 2020, **44**, 5071–5078.
- 16 K. S. Bhat and H. S. Nagaraja, *ChemistrySelect*, 2020, **5**, 2455–2464.

- 17 P. Cheng, C. Yuan, Q. Zhou, X. Hu, J. Li, X. Lin, X. Wang, M. Jin, L. Shui, X. Gao, R. Nötzel, G. Zhou, Z. Zhang and J. Liu, *J. Phys. Chem. C*, 2019, **123**, 5833–5839.
- 18 J. Bai, T. Meng, D. Guo, S. Wang, B. Mao and M. Cao, *ACS Appl. Mater. Interfaces*, 2018, **10**, 1678–1689.
- 19 Z. Yu, Y. Bai, S. Zhang, Y. Liu and N. Zhang, *Int. J. Hydrogen Energy*, 2018, **43**, 8815–8823.
- 20 M. Zhu, Z. Zhang, H. Zhang, H. Zhang, X. Zhang, L. Zhang and S. Wang, *J. Colloid Interface Sci.*, , DOI:10.1016/j.jcis.2017.09.076.
- 21 W. Zhu, X. Yue, W. Zhang, S. Yu, Y. Zhang and J. Wang, , DOI:10.1039/b000000x.
- 22 W. Dai, K. Ren, Y. Zhu, Y. Pan, J. Yu and T. Lu, *J. Alloys Compd.*, 2020, **844**, 156252.
- 23 S. Shit, S. Chhetri, S. Bolar, N. C. Murmu, W. Jang, H. Koo and T. Kuila, *ChemElectroChem*, 2019, **6**, 430–438.
- 24 W. Liu, J. Bao, M. Guan, Y. Zhao, J. Lian, J. Qiu, L. Xu, Y. Huang, J. Qian and H. Li, *Dalt. Trans.*, 2017, **46**, 8372–8376.
- 25 G. Ren, Q. Hao, J. Mao, L. Liang, H. Liu, C. Liu and J. Zhang, *Nanoscale*, 2018, **10**, 17347–17353.
- 26 T. Chen, B. Vedhanarayanan, S. Lin, L. Shao, Z. Sofer, J. Lin and T. Lin, *J. Colloid Interface Sci.*, , DOI:10.1016/j.jcis.2020.04.034.
